# Supplementary material for: Effect of pore mesostructure on the electrooxidation of glycerol on Pt mesoporous catalysts
Source: Royal Society of Chemistry journal article supplement (doi:10.1039/d3ta01738a), 2023-01-01
Supplement: d3ta01738a1.xlsx [file d3ta01738a1.xlsx]

## Sheet: Pd-PdNi_solv
Pt(111) AND Pt(100) FULL REACTION - All values in eV
	Molecules & Surfaces
	System	E, eV	E, eV	ZPE, eV	mi, eV	Sol, eV
	E(Pt111)=	-179.094	-179.094	0	0	0
	E(Pt100)=	-170.966	-170.966	0	0	0
	E(H2)=	-7.16219	-7.15082	0.29863	-0.31	0
	E(H2O)=	-12.9731	-12.7962	0.590094	-0.46	-0.307
	E(HCOOH)=	-25.6717	-25.327	0.900677	-0.7804	-0.465
	E(Gly)=	-66.3182	-68.2727	3.19952	-0.82	-0.425
	E(GD)=	-59.0175	-60.319	2.50251	-0.82	-0.381
	E(DHA)=	-59.1384	-60.4726	2.53523	-0.83	-0.371
	Pt(111)
	Reac1 (Gly-DHA-HPA)	System	n_Gly	n_H2O	n_H2	n_HCOOH	Esol, eV	ZPE, eV	E+ZPE, eV	E+ZPE+Sol, eV	dE, eV	Er, eV	Diff, eV
	a	G0b-Gly	1	0	0	0	-0.280979	3.21063	-244.706	-244.987	0.425174	0	---
	b	G1a	1	0	1	0	-0.248595	2.89462	-241.28	-241.529	0.302853	-0.122321	-0.122321
	c	G2a-DHA	1	0	2	0	-0.250754	2.52505	-237.491	-237.742	0.508792	0.0836174	0.205938
	d	G3	1	0	3	0	-0.241388	2.23844	-234.07	-234.311	0.357805	-0.0673697	-0.150987
	e	G4	1	0	4	0	-0.280214	1.90132	-230.101	-230.382	0.706644	0.28147	0.34884
	f	G5	1	0	5	0	-0.180717	1.592	-227.044	-227.225	0.282065	-0.14311	-0.42458
	g	G5-H2O	1	1	5	0	-0.322479	2.27851	-239.543	-239.865	0.614854	0.18968	0.332789
	h	G5-OH	1	1	6	0	-0.235495	1.96122	-235.179	-235.414	1.48504	1.05986	0.870181
	i	G5OH-HPA	1	1	6	0	-0.312634	2.02923	-235.498	-235.811	1.0881	0.662926	-0.396935	0.806035
	Reac2 (Gly-GD-GLA)	System	n_Gly	n_H2O	n_H2	n_HCOOH	Esol, eV	ZPE, eV	E+ZPE, eV	E+ZPE+Sol, eV	dE, eV	Er, eV	Diff, eV
	a	G0b-Gly	1	0	0	0	-0.280979	3.21002	-244.707	-244.988	0.424564	-0.00061	---
	b	G1b	1	0	1	0	-0.258488	2.87702	-241.151	-241.41	0.421915	-0.00325966	-0.00264966
	c	G2c-GD	1	0	2	0	-0.277627	2.53782	-237.256	-237.534	0.716385	0.291211	0.29447	0.207593
	d	G3b	1	0	3	0	-0.181614	2.23179	-234.33	-234.512	0.157296	-0.267879	-0.559089
	e	G3-H2O	1	1	3	0	-0.464568	2.90933	-246.881	-247.346	0.296423	-0.128751	0.139128
	f	G3-OH	1	1	4	0	-0.456169	2.59268	-242.37	-242.826	1.2356	0.810429	0.93918
	g	G3OH-GLA	1	1	4	0	-0.346174	2.68182	-242.856	-243.202	0.85911	0.433936	-0.376494	0.701814
	Reac3 (GLA-GA-FA)	System	n_Gly	n_H2O	n_H2	n_HCOOH	Esol, eV	ZPE, eV	E+ZPE, eV	E+ZPE+Sol, eV	dE, eV	Er, eV	Diff, eV
	a	G3OH-GLA	1	1	4	0	-0.346174	2.68329	-242.855	-243.201	0.86058	0.435406	---
	b	G4	1	1	5	0	-0.503592	2.37657	-239.238	-239.742	0.738326	0.313152	-0.122254
	c	G4-H2O	1	2	5	0	-0.665354	3.07107	-251.655	-252.32	1.13311	0.707935	0.394784
	d	G4-OH	1	2	6	0	-0.42058	2.73465	-247.408	-247.829	2.04329	1.61812	0.910182
	e	G4OH	1	2	6	0	-0.545814	2.81183	-247.871	-248.417	1.45539	1.03021	-0.587906	0.71706
	f	G4OH-FA-GA	1	2	6	0	-0.267531	2.76696	-248.712	-248.98	0.892585	0.467411	-0.5628
	g	G4OH-GA	1	2	6	1	-0.373641	1.79895	-223.426	-223.8	0.400888	-0.0242866	-0.491698
	h	G5	1	2	7	1	-0.248635	1.50603	-219.998	-220.246	0.373124	-0.0520505	-0.0277639
	i	G5-H2O	1	3	7	1	-0.509166	2.18295	-232.345	-232.854	0.738382	0.313208	0.365258
	j	G5-OH	1	3	8	1	-0.389049	1.87079	-228.45	-228.839	1.17199	0.746811	0.433603
	k	G5OH	1	3	8	1	-0.474756	1.94065	-228.359	-228.834	1.17761	0.752435	0.0056235	0.804485
	l	G5OH-FA-FA	1	3	8	1	-0.344857	1.8538	-228.902	-229.247	0.764352	0.339177	-0.413257
	m	G5OH-FA	1	3	8	2	-0.366509	0.911459	-203.784	-204.15	0.189454	-0.23572	-0.574897
	Reac3 (GA-OA)	System	n_Gly	n_H2O	n_H2	n_HCOOH	Esol, eV	ZPE, eV	E+ZPE, eV	E+ZPE+Sol, eV	dE, eV	Er, eV	Diff, eV
	a	G4OH-GA	1	2	6	1	-0.370909	1.80125	-223.428	-223.798	0.402016	-0.0231579	---
	b	G5	1	2	7	1	-0.248456	1.50371	-219.999	-220.248	0.371845	-0.0533294	-0.0301714
	c	G6	1	2	8	1	-0.13019	1.15867	-216.179	-216.309	0.729098	0.303924	0.357253	0.73
	d	G7	1	2	9	1	-0.183638	0.895357	-212.976	-213.159	0.297894	-0.12728	-0.431204
	e	G7-H2O	1	3	9	1	-0.330436	1.57667	-225.446	-225.776	0.653855	0.228681	0.355961
	f	G7-OH	1	3	10	1	-0.197464	1.25905	-221.012	-221.21	1.6394	1.21422	0.985542	0.717897
	g	G7OH-OA	1	3	10	1	-0.475697	1.3001	-221.358	-221.833	1.01579	0.590617	-0.623606	0.717897
	Reac4 (GLA-TTA-MLA)	System	n_Gly	n_H2O	n_H2	n_HCOOH	Esol, eV	ZPE, eV	E+ZPE, eV	E+ZPE+Sol, eV	dE, eV	Er, eV	Diff, eV
	a	G3OH-GLA	1	1	4	0	-0.346174	2.68207	-242.856	-243.202	0.85936	0.434186	---
	b	G4	1	1	5	0	-0.502892	2.37342	-239.241	-239.744	0.736239	0.311064	-0.123121
	c	G5	1	1	6	0	-0.293827	2.03549	-235.809	-236.103	0.795795	0.370621	0.0595562
	d	G6	1	1	7	0	-0.475996	1.75474	-232.375	-232.851	0.466563	0.0413887	-0.329232	0.671477
	e	G6-H2O	1	2	7	0	-0.319428	2.43881	-245.095	-245.414	0.876839	0.451665	0.410276
	f	G6-OH	1	2	8	0	-0.465193	2.12573	-240.578	-241.043	1.66683	1.24166	0.789993
	g	G6OH-TTA	1	2	8	0	-0.353198	2.19943	-241.219	-241.572	1.13804	0.712866	-0.528792	0.671477
	h	G7	1	2	9	0	-0.242559	1.87375	-236.985	-237.228	1.90145	1.47627	0.763405
	i	G8-MLA	1	2	10	0	-0.209514	1.55826	-233.809	-234.019	1.52929	1.10412	-0.372154
	React5 (DHA-PV-LA)	System	n_Gly	n_H2O	n_H2	n_HCOOH	Esol, eV	ZPE, eV	E+ZPE, eV	E+ZPE+Sol, eV	dE, eV	Er, eV	Diff, eV
1	a	G2a-DHA	1	0	2	0	-0.250754	2.52595	-237.49	-237.741	0.509692	0.0845174	---
2	b	r1	1	0	2	0	-0.160976	2.48734	-237.322	-237.483	0.767352	0.342178	0.25766
3	c	r2	1	0	2	0	-0.164129	2.4841	-237.724	-237.888	0.36218	-0.062994	-0.405172
4	d	r3	1	0	2	0	-0.201787	2.47137	-238.159	-238.36	-0.109982	-0.535156	-0.472162
5	e	r4-PV	1	-1	2	0	-0.103038	1.77984	-225.525	-225.628	-0.350572	-0.775746	-0.24059
6	f	r5	1	0	2	0	-0.257748	2.43844	-238.046	-238.304	-0.0532332	-0.478407	0.297339
7	g	r6	1	0	2	0	-0.186022	2.45924	-237.887	-238.073	0.177203	-0.247971	0.230436
8	h	r7	1	0	2	0	-0.329556	2.51574	-237.703	-238.033	0.217539	-0.207635	0.0403358
9	i	r8	1	0	2	0	-0.180436	2.53845	-237.275	-237.455	0.794869	0.369695	0.57733
10	j	r9-LA	1	0	2	0	-0.180436	2.55716	-238.317	-238.498	-0.247413	-0.672587	-1.04228
	React4 (TTA-OA)	System	n_Gly	n_H2O	n_H2	n_HCOOH	Esol, eV	ZPE, eV	E+ZPE, eV	E+ZPE+Sol, eV	dE, eV	Er, eV	Diff, eV
	a	r0-G6OH-TTA	1	2	8	0	-0.353198	2.20012	-241.218	-241.571	1.13873	0.713556	---
	b	r1	1	2	8	0	-0.438299	2.11362	-241.155	-241.593	1.11707	0.691895	-0.0216606
	c	r2	1	2	8	1	-0.296672	1.17775	-216.141	-216.438	0.600438	0.175264	-0.516631
	d	r3	1	2	9	1	-0.182392	0.891605	-212.982	-213.164	0.293222	-0.131952	-0.307216	0.66512
	e	r4	1	3	9	1	-0.443526	1.53832	-225.387	-225.83	0.599966	0.174791	0.306743
	f	r5	1	3	10	1	-0.37843	1.2231	-221.01	-221.389	1.46041	1.03523	0.86044
	g	r6-OA	1	3	10	1	-0.494695	1.3013	-221.396	-221.891	0.958342	0.533168	-0.502063	0.66512
	Pt(100)
	Reac1 (Gly-DHA-HPA)	System	n_Gly	n_H2O	n_H2	n_HCOOH	Esol, eV	ZPE, eV	E+ZPE, eV	E+ZPE+Sol, eV	dE, eV	Er, eV	Diff, eV
	a	G0b-Gly	1	0	0	0	-0.323475	3.2193	-236.575	-236.898	0.386416	0	---
	b	G1a	1	0	1	0	-0.251909	2.89656	-233.267	-233.519	0.184431	-0.201985	-0.201985
	c	G2a-DHA	1	0	2	0	-0.264027	2.89656	-229.343	-229.607	0.515357	0.128941	0.330926
	d	G3	1	0	3	0	-0.243635	2.24096	-226.014	-226.258	0.283297	-0.103119	-0.23206
	e	G4	1	0	4	0	-0.280295	1.90901	-222.118	-222.399	0.561667	0.175251	0.27837
	f	G5	1	0	5	0	-0.184729	1.59588	-218.985	-219.169	0.209853	-0.176564	-0.351815
	g	G5-H2O	1	1	5	0	-0.337126	2.28027	-231.554	-231.891	0.461273	0.0748561	0.25142
	h	G5-OH	1	1	6	0	-0.303743	1.96702	-227.577	-227.881	0.890613	0.504196	0.42934
	i	G5OH-HPA	1	1	6	0	-0.398593	2.03839	-227.349	-227.748	1.02333	0.636912	0.132716	0.813476
	Reac2 (Gly-GD-GLA)	System	n_Gly	n_H2O	n_H2	n_HCOOH	Esol, eV	ZPE, eV	E+ZPE, eV	E+ZPE+Sol, eV	dE, eV	Er, eV	Diff, eV
	a	G0b-Gly	1	0	0	0	-0.269216	3.1891	-236.498	-236.767	0.517705	0.131289	---
	b	G1b	1	0	1	0	-0.256706	2.85149	-233.123	-233.38	0.323695	-0.0627215	-0.19401		-0.19401
	c	G2c-GD	1	0	2	0	-0.279859	2.53221	-229.133	-229.413	0.709856	0.32344	0.386161		0.192151
	d	G3b	1	0	3	0	-0.173097	2.24459	-226.435	-226.608	-0.0666704	-0.453087	-0.776527		-0.584376
	e	G3-H2O	1	1	3	0	-0.389442	2.88942	-238.972	-239.362	0.152723	-0.233693	0.219394		-0.364982
	f	G3-OH	1	1	4	0	-0.475062	2.62254	-234.892	-235.367	0.56601	0.179593	0.413286		0.0483042
	g	G3OH-GLA	1	1	4	0	-0.353894	2.6795	-234.737	-235.091	0.842556	0.456139	0.276546	0.909226	0.32485
	Reac3 (GLA-GA-FA)	System	n_Gly	n_H2O	n_H2	n_HCOOH	Esol, eV	ZPE, eV	E+ZPE, eV	E+ZPE+Sol, eV	dE, eV	Er, eV	Diff, eV
	a	G3OH-GLA	1	1	4	0	-0.353998	2.67571	-234.741	-235.095	0.837928	0.451511	---
	b	G4	1	1	5	0	-0.504618	2.3883	-231.201	-231.706	0.646422	0.260006	-0.191505
	c	G4-H2O	1	2	5	0	-0.626497	3.05616	-243.734	-244.36	0.965226	0.578809	0.318804
	d	G4-OH	1	2	6	0	-0.440287	2.73361	-239.938	-240.378	1.36648	0.98006	0.401251
	e	G4OH	1	2	6	0	-0.530858	2.81896	-239.713	-240.244	1.50054	1.11412	0.134061	0.854116
	f	G4OH-FA-GA	1	2	6	0	-0.265956	2.75516	-240.555	-240.821	0.923205	0.536788	-0.577334
	g	G4OH-GA	1	2	6	1	-0.243814	1.80759	-215.333	-215.577	0.495719	0.109302	-0.427486
	h	G5	1	2	7	1	-0.217428	1.504	-212.035	-212.252	0.239501	-0.146915	-0.256218
	i	G5-H2O	1	3	7	1	-0.558464	2.17759	-224.472	-225.03	0.434257	0.0478407	0.194756
	j	G5-OH	1	3	8	1	-0.395397	1.85846	-220.749	-221.144	0.739129	0.352712	0.304872
	k	G5OH	1	3	8	1	-0.483013	1.929	-220.232	-220.715	1.16863	0.782215	0.429503
	l	G5OH-FA-FA	1	3	8	1	-0.410276	1.8577	-220.807	-221.217	0.666231	0.279815	-0.5024	0.929131
	m	G5OH-FA	1	3	8	2	-0.393861	0.914205	-195.662	-196.055	0.156323	-0.230094	-0.509909
	Reac3 (GA-OA)	System	n_Gly	n_H2O	n_H2	n_HCOOH	Esol, eV	ZPE, eV	E+ZPE, eV	E+ZPE+Sol, eV	dE, eV	Er, eV	Diff, eV
	a	G4OH-GA	1	2	6	1	-0.246732	1.80869	-215.331	-215.578	0.494881	0.108464	---
	b	G5	1	2	7	1	-0.215406	1.50206	-212.037	-212.253	0.238708	-0.147709	-0.256173
	c	G6	1	2	8	1	-0.178992	1.18302	-208.224	-208.403	0.507145	0.120728	0.268437
	d	G7	1	2	9	1	-0.181598	0.885925	-205.012	-205.194	0.135227	-0.25119	-0.371918
	e	G7-H2O	1	3	9	1	-0.252929	1.5489	-217.534	-217.787	0.515484	0.129067	0.380257
	f	G7-OH	1	3	10	1	-0.185695	1.27658	-213.666	-213.851	0.870123	0.483707	0.35464
	g	G7OH-OA	1	3	10	1	-0.469877	1.29455	-213.236	-213.706	1.01509	0.628676	0.144969	0.879866
	Reac4 (GLA-TTA-MLA)	System	n_Gly	n_H2O	n_H2	n_HCOOH	Esol, eV	ZPE, eV	E+ZPE, eV	E+ZPE+Sol, eV	dE, eV	Er, eV	Diff, eV
	a	G3OH-GLA	1	1	4	0	-0.355787	2.6834	-234.732	-235.088	0.84532	0.458904	---
	b	G4	1	1	5	0	-0.501091	2.3745	-231.205	-231.707	0.645789	0.259372	-0.199532
	c	G5	1	1	6	0	-0.286954	2.04708	-227.874	-228.161	0.610123	0.223707	-0.0356655
	d	G6	1	1	7	0	-0.431908	1.73815	-224.368	-224.8	0.389739	0.00332295	-0.220384	0.773764
	e	G6-H2O	1	2	7	0	-0.326785	2.43469	-237.156	-237.483	0.680402	0.293986	0.290663
	f	G6-OH	1	2	8	0	-0.406292	2.11876	-233.014	-233.42	1.16181	0.775396	0.48141	0.773764
	g	G6OH-TTA	1	2	8	0	-0.354146	2.20257	-233.065	-233.419	1.1635	0.777087	0.00169092	0.773764
	h	G7	1	2	9	0	-0.241857	1.86616	-229.055	-229.297	1.70389	1.31747	0.540388
	i	G8-MLA	1	2	10	0	-0.19938	1.55495	-225.882	-226.081	1.33862	0.952206	-0.365268
	React5 (DHA-PV-LA)	System	n_Gly	n_H2O	n_H2	n_HCOOH	Esol, eV	ZPE, eV	E+ZPE, eV	E+ZPE+Sol, eV	dE, eV	Er, eV	Diff, eV
1	a	G2a-DHA	1	0	2	0	-0.264027	2.51984	-229.344	-229.608	0.514597	0.128181	---
2	b	r1	1	0	2	0	-0.223493	2.47773	-229.925	-230.149	-0.0264845	-0.412901	-0.541081
3	c	r2	1	0	2	0	-0.274755	2.47859	-230.134	-230.409	-0.286213	-0.67263	-0.259729
4	d	r3	1	0	2	0	-0.17318	2.48251	-230.508	-230.681	-0.558447	-0.944864	-0.272234
5	e	r4-PV	1	-1	2	0	-0.0777466	1.7831	-217.288	-217.366	-0.216861	-0.603278	0.341586
6	f	r5	1	0	2	0	-0.231055	2.46341	-229.852	-230.083	0.0395834	-0.346833	0.256445
7	g	r6	1	0	2	0	-0.188121	2.47776	-230.237	-230.425	-0.30293	-0.689347	-0.342514
8	h	r7	1	0	2	0	-0.396526	2.51272	-229.47	-229.867	0.255908	-0.130509	0.558838
9	i	r8	1	0	2	0	-0.247156	2.50663	-229.501	-229.748	0.374245	-0.0121714	0.118337
10	j	r9-LA	1	0	2	0	-0.23	2.57223	-230.218	-230.448	-0.325126	-0.711543	-0.699371
	React4 (TTA-OA)	System	n_Gly	n_H2O	n_H2	n_HCOOH	Esol, eV	ZPE, eV	E+ZPE, eV	E+ZPE+Sol, eV	dE, eV	Er, eV	Diff, eV
	a	r0-G6OH-TTA	1	2	8	0	-0.366224	2.20616	-233.062	-233.428	1.15366	0.767242	---
	b	r1	1	2	8	0	-0.40105	2.12635	-233.304	-233.705	0.877514	0.491097	-0.276144
	c	r2	1	2	8	1	-0.175038	1.18755	-208.732	-208.907	0.00333755	-0.383079	-0.874176
	d	r3	1	2	9	1	-0.180808	0.884155	-205.014	-205.195	0.134628	-0.251789	0.13129	0.818676
	e	r4	1	3	9	1	-0.464882	1.54368	-217.458	-217.923	0.379137	-0.00727974	0.244509
	f	r5	1	3	10	1	-0.366241	1.24148	-213.464	-213.831	0.890679	0.504263	0.511543
	g	r6-OA	1	3	10	1	-0.508003	1.29311	-213.26	-213.768	0.953303	0.566887	0.0626241	0.818676
